# Supplementary material for: Advances in the application of novel carbon nanomaterials in illicit drug detection
Source: Royal Society of Chemistry journal article supplement (doi:10.1039/d2nj04816g), 2022-12-31
Supplement: d2nj04816g1.pdf [file d2nj04816g1.pdf]

**Particle: Advances in the application of  
novel carbon nanomaterials in illicit  
drug detection**

**HUANG Rui,\* YANG Ting and MOU Yan Yan**

## Supporting Information

### 1. Carbon dots functionalized papers for high-throughput sensing of 4-chloroethcathinone and its analogues in crime sites.

Yen YaoTe, Lin YuSyuan, Chen TingYueh, Chyueh SanChong and Chang HuanTsung

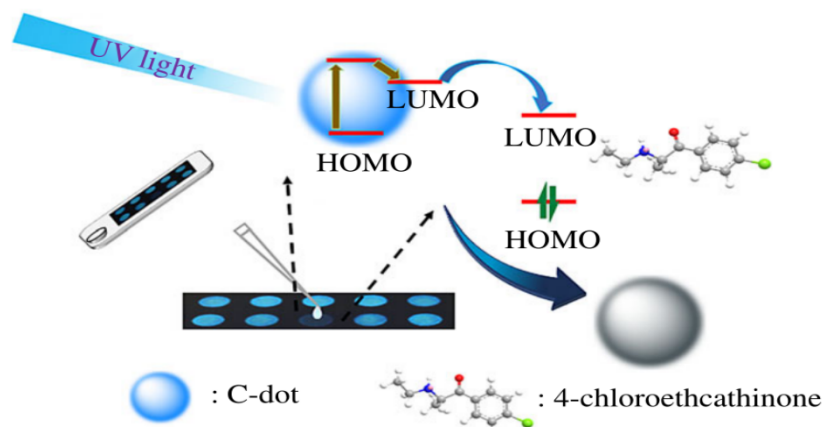

Figure S1 Schematic illustration of C-dot-functionalized paper (CDFP) for detection of 4-chloroethcathinone.

### 2. Development of Carbon Quantum Dot-Labeled Antibody Fluorescence Immunoassays for the Detection of Morphine in Hot Pot Soup Base.

Can Zhang, Xinxin Yu, XiaoMan Shi, YuFeng Han, ZhiMing Guo and Yuan Liu

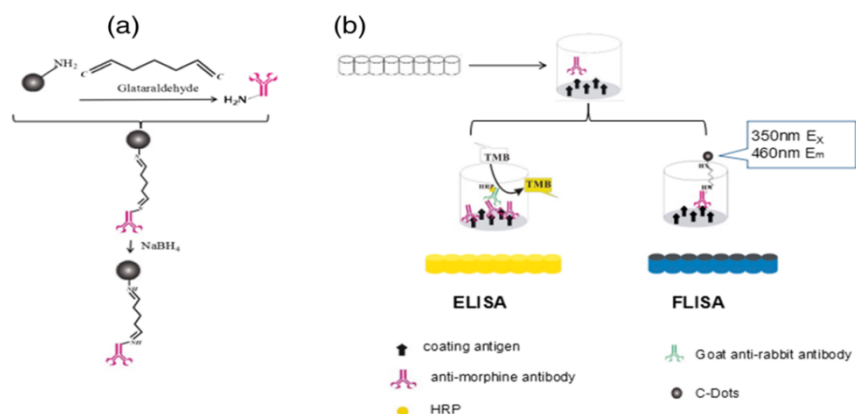

Figure S2 Illustration of fluorescence immunoassay of anti-morphine antibody labeled Carbon Quantum Dots.

### 3. Functionalization of graphene quantum dots with antimorphine: Design of selective nanosensor for detection of morphine.

Majid Masteri-Farahani, Nazanin Mosleh

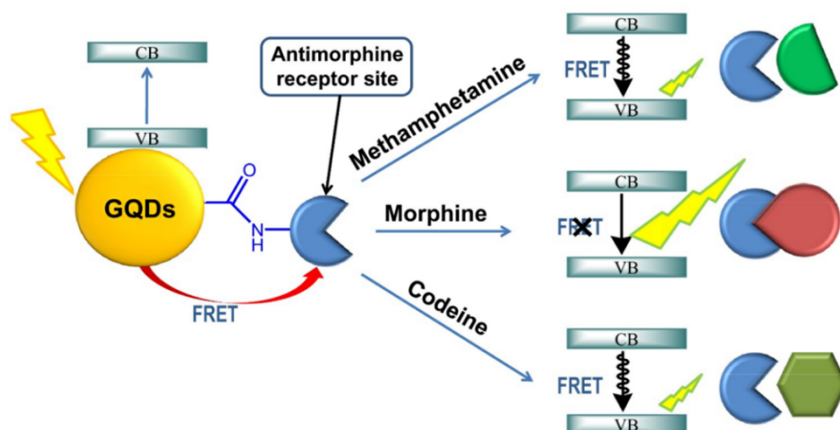

Figure S3 Schematic diagram of specific recognition of morphine by nano sensor.

### 4. A novel label-free fluorescence aptamer-based sensor method for cocaine detection based on isothermal circular strand-displacement amplification and graphene oxide absorption.

Li Qiu, Hui Zhou and Wenping Zhu

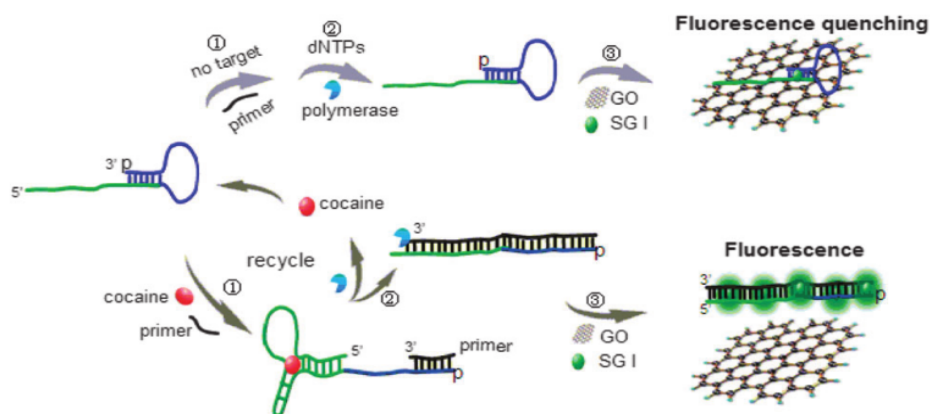

Figure S4 Schematic representation of the label-free fluorescent aptamer-based sensor method for cocaine detection based on GO and ICSDA.

## 5. Advances in the application of novel carbon nanomaterials in illicit drug detection.

HUANG Rui,\* YANG Ting and MOU Yan Yan

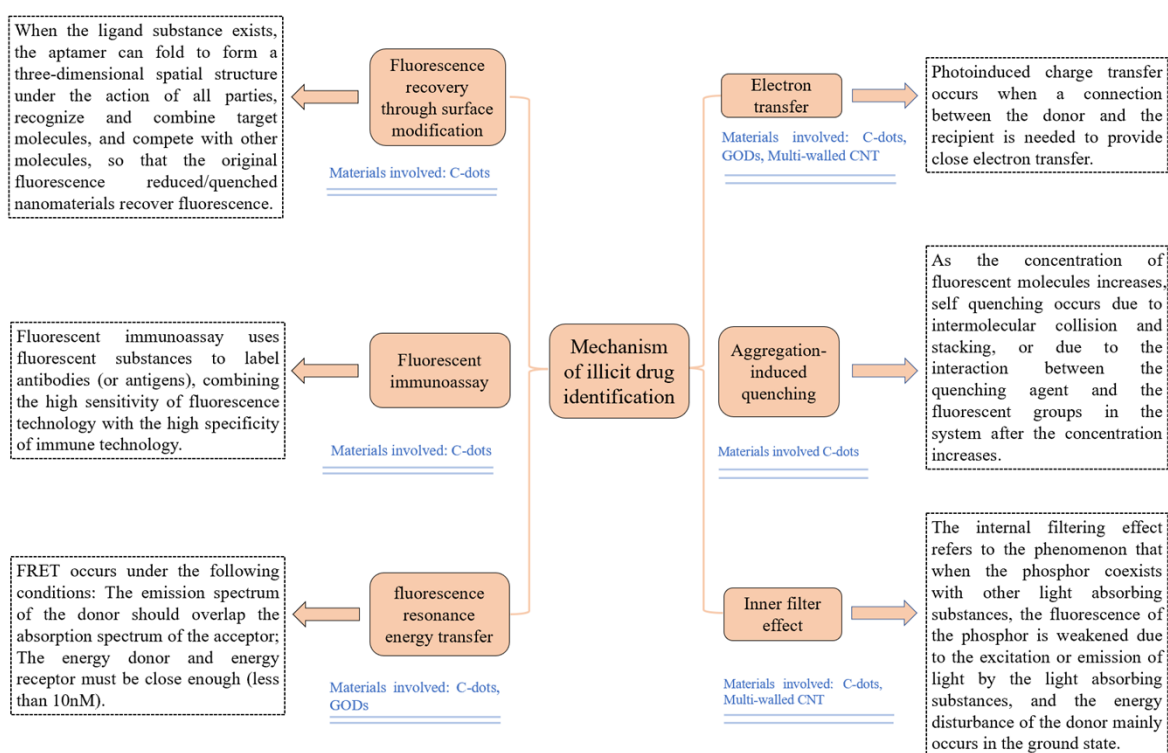

Figure S5 The mechanism of illicit drug detection using carbon dots, graphene and carbon nanotubes.
